# Supplementary material for: N-Heterocyclic olefins and thioureas as an efficient cooperative catalyst system for ring-opening polymerization of δ-valerolactone
Source: Royal Society of Chemistry journal article supplement (doi:10.1039/c9py00018f), 2019-01-01
Supplement: c9py00018f1.pdf [file c9py00018f1.pdf]

# *N*-Heterocyclic Olefins and Thioureas as an Efficient Cooperative Catalyst for Ring- Opening Polymerization of $\delta$ -Valerolactone

*Li Zhou*<sup>a c, ‡</sup>, *Guangqiang Xu*<sup>a, ‡</sup>, *Qaiser Mahmood*<sup>a</sup>, *Chengdong Lv*<sup>a c</sup>, *Xiaowu Wang*<sup>a</sup>, *Kai Guo*<sup>\*b</sup>, *Qinggang Wang*<sup>\*a</sup>

- a. Key Laboratory of Biobased Materials, Qingdao Institute of Bioenergy and Bioprocess Technology, Chinese Academy of Sciences, Qingdao, 266101, China.
- b. State Key Laboratory of Materials-Oriented Chemical Engineering, College of Biotechnology and Pharmaceutical Engineering, Nanjing Tech University, Nanjing, 211816, China.
- c. Center of Materials Science and Optoelectronics Engineering, University of Chinese Academy of Sciences, Beijing, 100049, China.

## 1. General Experimental Procedure

### Preparation of Thioureas

Thioureas are prepared by mixing the appropriate amine and isothiocyanate in a solution of MeOH (Scheme S1). The solution was stirred in the room temperature for 30 minutes. Then MeOH is removed under vacuum and the products were purified by washing with hexanes or pentane three times. After vacuum filtration, the filter residue was vacuum drying at 50 °C for 24 h. The spectra of thioureas (TU1, TU2, TU3) match those from the literature. [1]

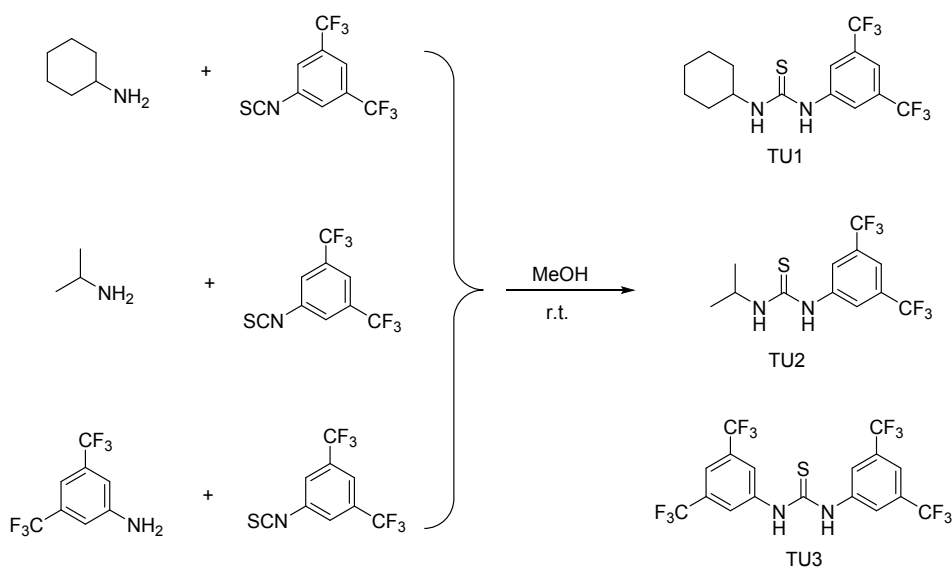

**Scheme S1.** Schematic synthesis of TUs (TU1, TU2, TU3).

### Preparation of NHOs

NHOs (NHO1, NHO2, NHO3) were prepared as described previously. [2] NHOs (NHO1, NHO2, NHO3) was synthesized by deprotonation of the corresponding precursor salt (Scheme S2) using KHMDS. The identity of target compounds NHO1, NHO2, NHO3 was confirmed by  $^1\text{H}$  and  $^{13}\text{C}$  NMR spectroscopy and they were stored in a glove box at -35 °C. For full characterization of NHO1, [3] NHO2, [4] NHO3, [5] see the cited literature.

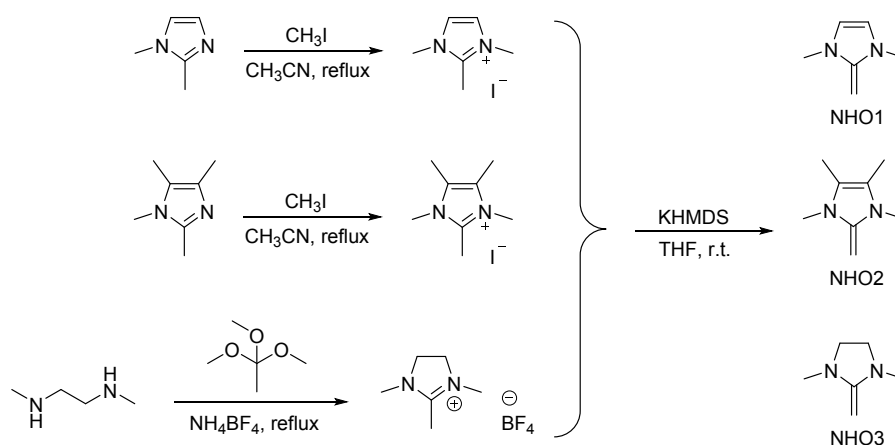

**Scheme S2.** Schematic synthesis of NHOs (NHO1, NHO2, NHO3).

## References

- [1] Štrukil, V.; Igrc, M. D.; Eckert-Maksić, M.; Friščić, T. *Chem. Eur. J.*, **2012**, *18*, 8464-8473.  
 [2] Chen, W. -C.; Shen, J. -S.; Jurca, T.; Peng, C. -J.; Lin, Y. -H.; Wang, Y. -P.; Shih, W. -C.; Yap, G. P. A.; Ong, T. -G. *Angew. Chem. Int. Ed.* **2015**, *127*, 15422 -15427.  
 [3] Vitthal, B. S.; Bhalchandra M. B. *ChemSusChem*, **2016**, *9*, 1980-1985.  
 [4] Kuhn, N.; Bohnen, H.; Kreutzberg, J.; Bläser, D.; Böse, R. *J. Chem. Soc., Chem. Commun.* **1993**, 1136-1137.  
 [5] Gruseck, U.; Heuschmann, M. *Chem. Ber.* **1987**, *120*, 2053-2064.

## Typical procedure for polymerization of $\delta$ -VL

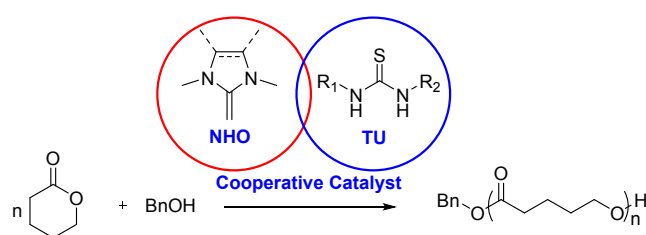

In an Ar-filled glovebox, the catalysts of NHO (0.05 mmol, 0.01 eq.), TU (0.1 mmol, 0.02 eq.) and initiator of BnOH (0.1 mmol, 0.02 eq.) were dissolved into 1 mL toluene in Schlenk tube. Then 0.45 mL  $\delta$ -VL (5 mmol) was added via a syringe to the mixture solution. The reaction mixtures were stirred at room temperature. After the polymerization was completed, cool MeOH was added. The product was isolated by precipitation in *n*-hexane followed by drying thoroughly in vacuum.

## Typical procedure for polymerization of $\delta$ -VL without BnOH

In an Ar-filled glovebox, the catalysts of NHO (0.05 mmol, 0.01 eq.), TU (0.1 mmol, 0.02 eq.) and were dissolved into 1 mL toluene in Schlenk tube. Then 0.45 mL  $\delta$ -VL (5 mmol) was added via a syringe to the mixture solution. The reaction mixtures were stirred at room temperature. After the polymerization was completed, cool MeOH was added. The product was isolated by precipitation in *n*-hexane followed by drying thoroughly in vacuum.

## 2. Experimental Data

### 2.1 The mechanism study of NHO1/TU1 system (In the absence of BnOH) <sup>a</sup>

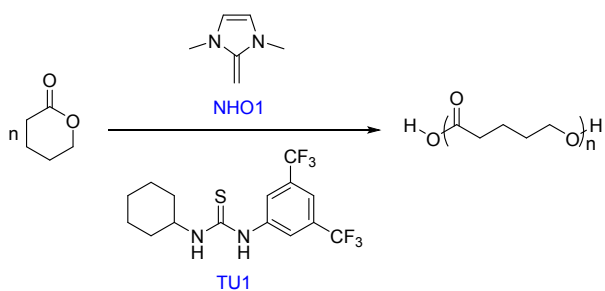

**Table S1 NHO1/TU1 Catalytic System for ROP of  $\delta$ -valerolactone**

| Entry          | NHO1/TU1/BnOH/ $\delta$ -VL | Time/h | Conv./% <sup>b</sup> | <i>M<sub>n</sub></i> (kg/mol) <sup>c</sup> | <i>D</i> <sup>c</sup> |
|----------------|-----------------------------|--------|----------------------|--------------------------------------------|-----------------------|
| 1              | 1:0:2:50                    | 5      | >99                  | 4.9                                        | 1.78                  |
| 2              | 1:2:0:50                    | 5      | >99                  | 20.4                                       | 1.30                  |
| 3              | 1:2:2:50                    | 5      | >99                  | 4.0                                        | 1.23                  |
| 4              | 1:1:0:20                    | 5      | >99                  | 9.0                                        | 1.49                  |
| 5              | 1:2:0:20                    | 5      | >99                  | 14.7                                       | 1.33                  |
| 6 <sup>d</sup> | 1:1:0:5                     | 12     | >99                  | 13.3                                       | 1.36                  |
| 7 <sup>d</sup> | 1:2:0:5                     | 12     | >99                  | 15.5                                       | 2.11                  |
| 8 <sup>e</sup> | 2:4:0:50                    | 4      | 29                   | 13.4                                       | 1.20                  |

<sup>a</sup>Conditions: room temperature,  $n_{\text{monomer}} = 2.5$  mmol, toluene (0.5 mL) as the solvent. <sup>b</sup>Monomer conversion determined by <sup>1</sup>H NMR spectroscopy. <sup>c</sup> Number-average molecular weights (*M<sub>n</sub>*) and polydispersity indices (*D*) determined by GPC analysis (THF). <sup>d</sup>room temperature,  $n_{\text{monomer}} = 0.1$  mmol, toluene (0.5 mL) as the solvent. <sup>e</sup>  $n_{\delta\text{-VL}} = 5$  mmol, toluene (1 mL) as the solvent, H<sub>2</sub>O as the initiator, NHO1:TU:H<sub>2</sub>O:M = 2:4:1:50.

The experimental results are summarized in Table S1. In the absence of TU1, the monomer conversion was > 99% and  $M_n$  was 4900 (entry 1). Without BnOH, comparatively high conversion of 99% was observed with NHO1/TU1 ratio of 1:2 (entry 2).  $M_n$  value improved from 4900 to 20400 g/mol. When the amount of monomer is reduced from 50 to 20, the molecular weight is still very high (entry 4, 5). While the amount of monomer is reduced to 5, the molecular weight can still reach 15500 (entry 7). When water is used instead of benzyl alcohol as an initiator, a conversion of 29% can be achieved in 4 hours, and the molecular weight is still high (entry 8). The above experimental results indicated that trace amount of water may be used as initiator in NHO1/TU1 system.  $^1\text{H}$  NMR spectra (Figure S1) of the obtained PVL can also verify this speculation.

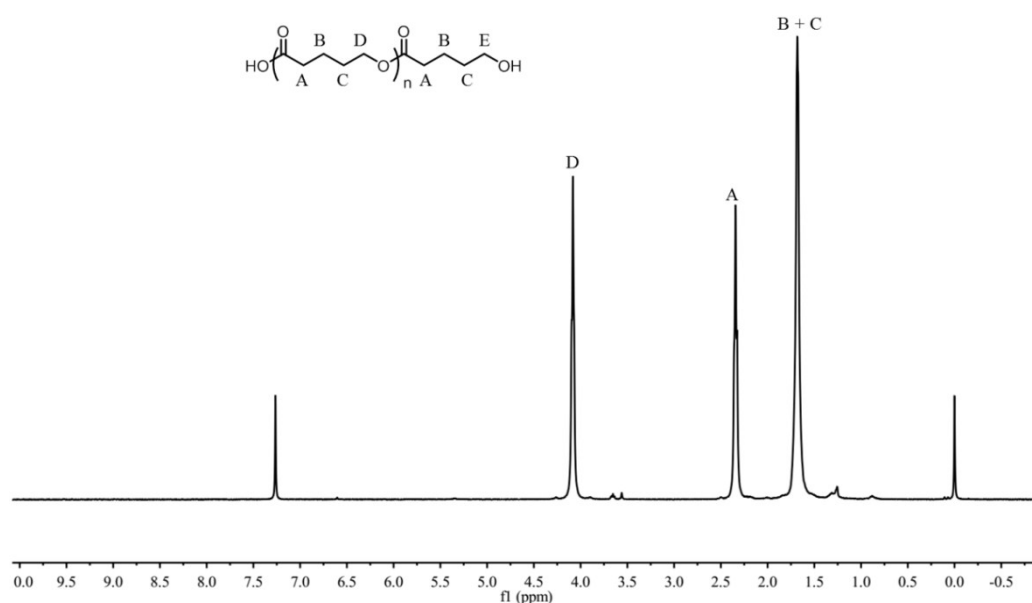

**Figure S1.**  $^1\text{H}$  NMR spectra of the obtained PVL in  $\text{CDCl}_3$ . The polymer (NHO1:TU1: BnOH: $\delta$ -VL = 1:2:0:5) was isolated by reprecipitation from toluene in cold methanol.

## 2.2 NHO/TU Catalytic System for ROP of $\delta$ -valerolactone

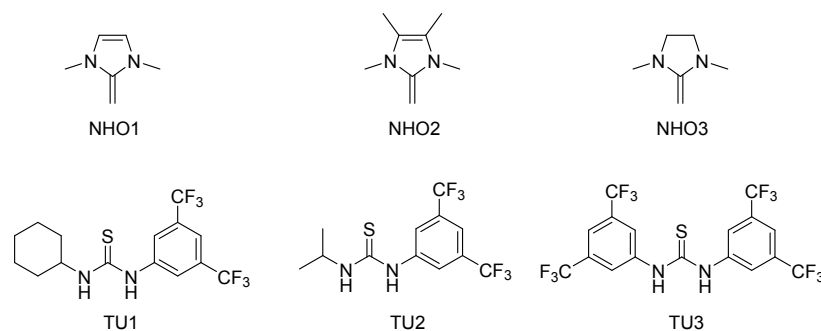

**Table S2 Optimization of conditions (NHO2/TU1)<sup>a</sup>**

| Entry | NHO2/TU1/BnOH/ $\delta$ -VL | Time/h | Conv./% <sup>b</sup> | <i>M<sub>n</sub></i> (kg/mol) <sup>c</sup> | <i>D</i> <sup>c</sup> |
|-------|-----------------------------|--------|----------------------|--------------------------------------------|-----------------------|
| 1     | 1:1:2:100                   | 12     | 97                   | 6.3                                        | 1.12                  |
| 2     | 1:1:0:100                   | 12     | 34                   | 11.0                                       | 1.16                  |
| 3     | 1:0:2:100                   | 12     | 42                   | 3.6                                        | 1.15                  |
| 4     | 1:0:0:100                   | 12     | 3                    | --                                         | --                    |
| 5     | 1:2:2:100                   | 4      | 95                   | 6.1                                        | 1.12                  |

<sup>a</sup>Conditions: room temperature,  $n_{\text{monomer}} = 5$  mmol, toluene (1 mL) as the solvent. <sup>b</sup>Monomer conversion determined by <sup>1</sup>H NMR spectroscopy. <sup>c</sup> Number-average molecular weights (*M<sub>n</sub>*) and polydispersity indices (*D*) determined by GPC analysis (THF).

**Table S3 ROP of  $\delta$ -VL using different NHOs and TUs<sup>a</sup>**

| Entry | NHO/TU/BnOH/ $\delta$ -VL               | Time/h | Conv./% <sup>b</sup> | <i>M<sub>n</sub></i> (kg/mol) <sup>c</sup> | <i>D</i> <sup>c</sup> |
|-------|-----------------------------------------|--------|----------------------|--------------------------------------------|-----------------------|
| 1     | NHO1/TU1/BnOH/ $\delta$ -VL = 1:2:2:100 | 4      | 97                   | 6.3                                        | 1.21                  |
| 2     | NHO1/TU1/BnOH/ $\delta$ -VL = 1:2:2:200 | 24     | 49                   | 5.1                                        | 1.13                  |
| 3     | NHO1/TU1/BnOH/ $\delta$ -VL = 1:1:0:100 | 12     | 52                   | 12.5                                       | 1.28                  |
| 4     | NHO1/TU1/BnOH/ $\delta$ -VL = 1:2:0:100 | 7      | 48                   | 9.8                                        | 1.36                  |
| 5     | NHO1/TU2/BnOH/ $\delta$ -VL = 1:2:2:100 | 7      | 97                   | 6.5                                        | 1.13                  |
| 6     | NHO1/TU2/BnOH/ $\delta$ -VL = 1:1:0:100 | 7      | 49                   | 8.6                                        | 1.34                  |
| 7     | NHO1/TU3/BnOH/ $\delta$ -VL = 1:2:2:100 | 12     | trace                | --                                         | --                    |
| 8     | NHO2/TU1/BnOH/ $\delta$ -VL = 1:1:2:100 | 12     | 97                   | 6.3                                        | 1.12                  |
| 9     | NHO2/TU1/BnOH/ $\delta$ -VL = 1:2:2:100 | 4      | 95                   | 6.1                                        | 1.12                  |
| 10    | NHO2/TU1/BnOH/ $\delta$ -VL = 1:1:0:100 | 12     | 34                   | 11.0                                       | 1.16                  |
| 11    | NHO2/TU1/BnOH/ $\delta$ -VL = 1:2:0:100 | 12     | 18                   | 5.9                                        | 1.18                  |
| 12    | NHO2/TU2/BnOH/ $\delta$ -VL = 1:2:2:100 | 7      | 95                   | 6.6                                        | 1.11                  |
| 13    | NHO2/TU2/BnOH/ $\delta$ -VL = 1:1:0:100 | 7      | 19                   | 6.4                                        | 1.20                  |
| 14    | NHO2/TU3/BnOH/ $\delta$ -VL = 1:2:2:100 | 7      | trace                | --                                         | --                    |
| 15    | NHO3/TU1/BnOH/ $\delta$ -VL = 1:2:2:100 | 4      | 93                   | 6.7                                        | 1.11                  |
| 16    | NHO3/TU1/BnOH/ $\delta$ -VL = 1:1:0:100 | 12     | 5                    | --                                         | --                    |

|    |                                         |    |       |     |      |
|----|-----------------------------------------|----|-------|-----|------|
| 17 | NHO3/TU2/BnOH/ $\delta$ -VL = 1:2:2:100 | 12 | 62    | 3.8 | 1.10 |
| 18 | NHO3/TU2/BnOH/ $\delta$ -VL = 1:1:0:100 | 12 | 7     | --  | --   |
| 19 | NHO3/TU3/BnOH/ $\delta$ -VL = 1:2:2:100 | 4  | trace | --  | --   |

<sup>a</sup>Conditions: room temperature,  $n_{\text{monomer}} = 5$  mmol, toluene (1 mL) as the solvent. <sup>b</sup>Monomer conversion determined by <sup>1</sup>H NMR spectroscopy. <sup>c</sup> Number-average molecular weights ( $M_n$ s) and polydispersity indices ( $D$ ) determined by GPC analysis (THF).

### 2.3 NHO/TU Catalytic System for ROP of D, L-LA and $\epsilon$ -CL <sup>a</sup>

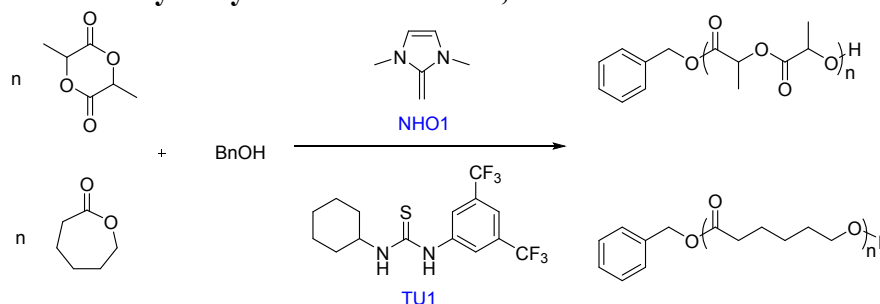

#### Typical procedure for polymerization of D, L-LA

In an Ar-filled glovebox, the catalysts of NHO (0.04 mmol, 0.01 eq.), TU (0.08 mmol, 0.02 eq.) and initiator of BnOH (0.08 mmol, 0.02 eq.) were dissolved into 2 mL THF in Schlenk tube. Then 0.29 g  $\delta$ -VL (2 mmol, 50 eq.) was added to the mixture solution. The reaction mixtures were stirred at room temperature. After the polymerization was completed, cool MeOH was added. The product was isolated by precipitation in *n*-hexane followed by drying thoroughly in vacuum.

#### Typical procedure for polymerization of $\epsilon$ -CL

In an Ar-filled glovebox, the catalysts of NHO (0.05 mmol, 0.01 eq.), TU (0.1 mmol, 0.02 eq.) and initiator of BnOH (0.1 mmol, 0.02 eq.) were dissolved into 1 mL toluene in Schlenk tube. Then 0.55 mL  $\delta$ -VL (5 mmol, 100 eq.) was added via a syringe to the mixture solution. The reaction mixtures were stirred at room temperature. After the polymerization was completed, cool MeOH was added. The product was isolated by precipitation in *n*-hexane followed by drying thoroughly in vacuum.

**Table S4 ROP of D, L-LA and  $\epsilon$ -CL**

| Entry          | Monomer | NHO1/TU1/BnOH/M | Time   | Conv./% <sup>b</sup> | $M_n$ /(g/mol) <sup>c</sup> | $D$ <sup>c</sup> |
|----------------|---------|-----------------|--------|----------------------|-----------------------------|------------------|
| 1 <sup>a</sup> | D,L-LA  | 1:2:2:200       | 10 min | >99%                 | 19.7                        | 1.44             |

|                |                |           |        |      |      |      |
|----------------|----------------|-----------|--------|------|------|------|
| 2 <sup>a</sup> | D,L-LA         | 1:2:1:200 | 10 min | >99% | 26.0 | 1.60 |
| 3 <sup>a</sup> | D,L-LA         | 1:2:2:500 | 4 h    | 33   | 24.4 | 1.14 |
| 4 <sup>d</sup> | $\epsilon$ -CL | 1:2:2:100 | 24 h   | 33   | 2.8  | 1.11 |

<sup>a</sup>Conditions: room temperature  $n_{\text{monomer}} = 2$  mmol, toluene (2 mL) as the solvent. <sup>b</sup>Monomer conversion determined by <sup>1</sup>H NMR spectroscopy. <sup>c</sup> Number-average molecular weights ( $M_n$ ) and polydispersity indices ( $\mathcal{D}$ ) determined by GPC analysis (THF). <sup>d</sup> $n_{\text{monomer}} = 5$  mmol, toluene (1 mL) as the solvent.

### 3. Spectral Data

#### 3.1 GPC Data

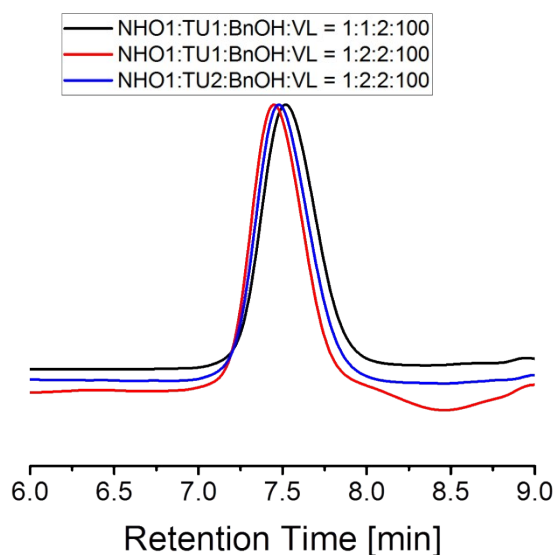

**Figure S2.** GPC traces for PVL (black, NHO1:TU1:BnOH: $\delta$ -VL = 1:1:2:100,  $M_n = 6000$ ,  $\mathcal{D} = 1.12$ ; red, NHO1:TU1:BnOH: $\delta$ -VL = 1:2:2:100,  $M_n = 6300$ ,  $\mathcal{D} = 1.21$ ; blue, NHO1:TU2:BnOH: $\delta$ -VL = 1:1:2:100,  $M_n = 6500$ ,  $\mathcal{D} = 1.13$ ) produced by NHO/TU/BnOH in toluene at room temperature. As can be seen from figure S2, the molecular weight distributions estimated by the GPC measurement were relatively low.



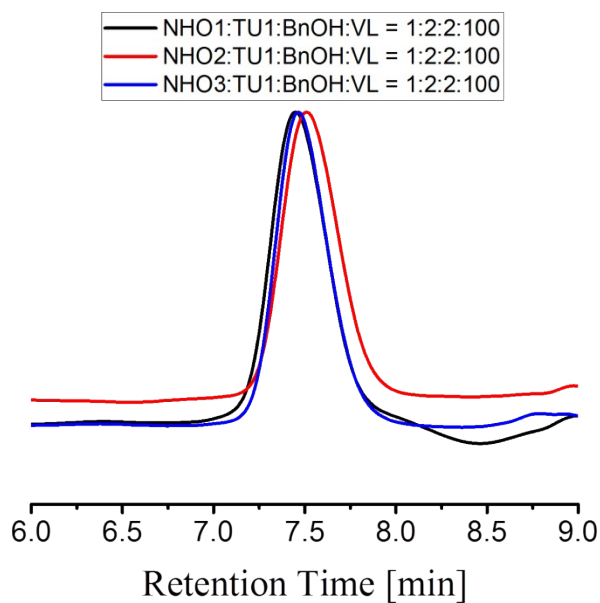

**Figure S3.** GPC traces for PVL (black, NHO1: $\delta$ -VL = 1:100,  $M_n$  = 6300,  $\bar{D}$  = 1.21; red, NHO2: $\delta$ -VL = 1:100,  $M_n$  = 6900,  $\bar{D}$  = 1.12; blue, NHO3: $\delta$ -VL = 1:100,  $M_n$  = 6700,  $\bar{D}$  = 1.11) produced by NHO/TU1/BuOH = 1:2:2 in toluene at room temperature. As can be seen from figure S3, the molecular weight distributions estimated by the GPC measurement were relatively low.

### 3.2 $^1\text{H}$ NMR Data

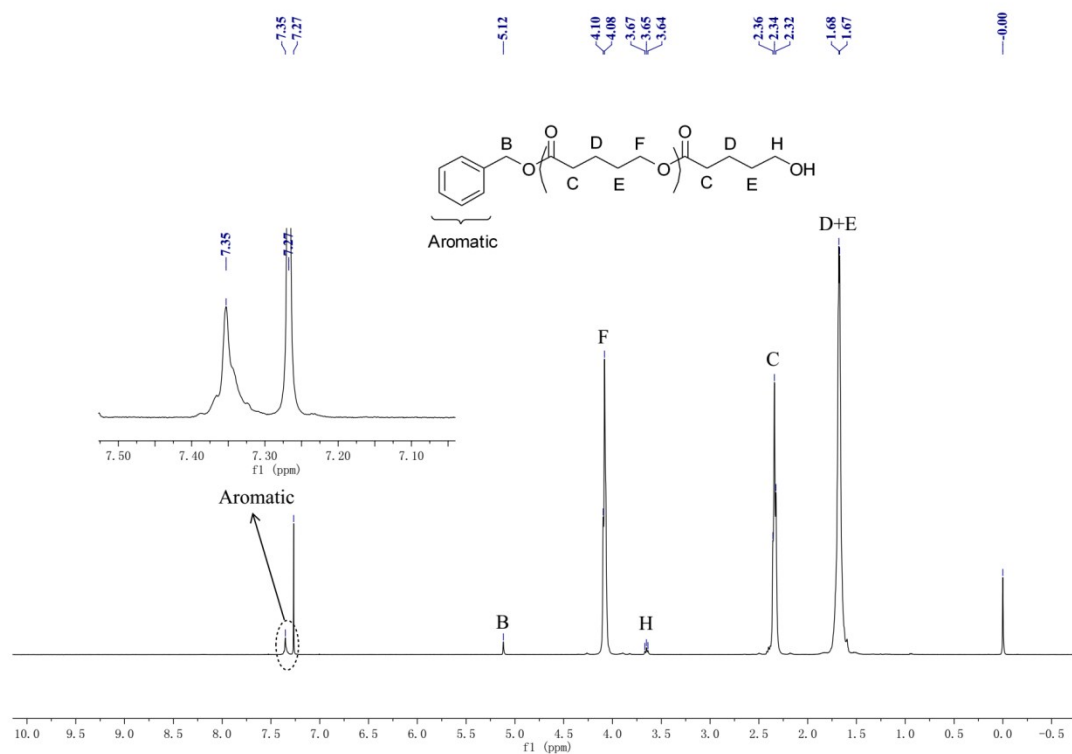

**Figure S4.**  $^1\text{H}$  NMR spectra of the obtained PVL in  $\text{CDCl}_3$ . The polymer (NHO1:TU1:BuOH: $\delta$ -VL = 1:2:2:100) was isolated by reprecipitation from toluene in cold methanol.  $^1\text{H}$  NMR (400 MHz,

CDCl<sub>3</sub>)  $\delta$  (ppm) 7.37-7.32 (m, 5H, Aromatic), 5.12 (s, 2H, ArCH<sub>2</sub>-), 4.10-4.08 (t, 2H  $\times$  n,  $J = 8.0$  Hz, (-CH<sub>2</sub>CH<sub>2</sub>O-)n), 3.67-3.64 (t, 2H,  $J = 12.0$  Hz, -CH<sub>2</sub>CH<sub>2</sub>OH), 2.36-2.32 (t, 2H  $\times$  n,  $J = 16.0$  Hz, (-OCOCH<sub>2</sub>CH<sub>2</sub>-)n), 1.68 (m, 2H  $\times$  n, (-COCH<sub>2</sub>CH<sub>2</sub>CH<sub>2</sub>-)n), 1.67 (m, 2H  $\times$  n, (-CH<sub>2</sub>CH<sub>2</sub>CH<sub>2</sub>O-)n). In the <sup>1</sup>H NMR spectrum (Figure S4), the peak centered around 7.4 ppm with relative peak area of 5, was ambiguously assigned to the BnO group.

### 3.3

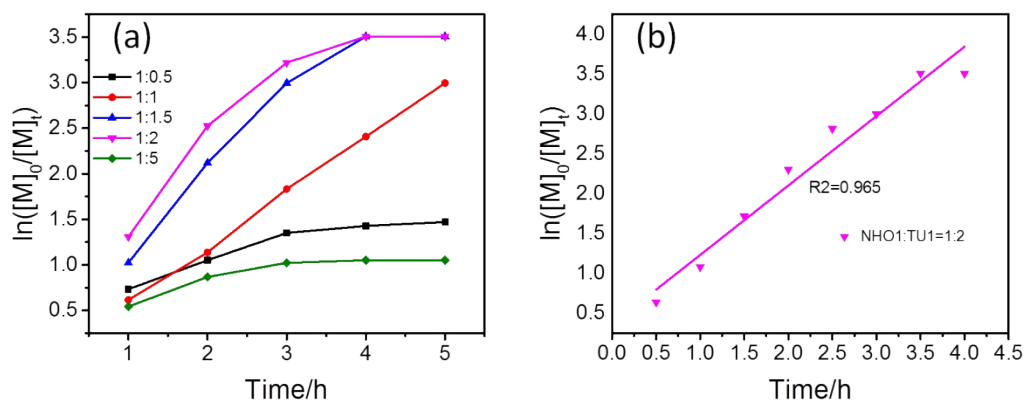

**Figure S5.** (a) Plots of  $\ln([M]_0/[M]_t)$  versus reaction time for the different ratio of NHO1 and TU1 - catalyzed AROPs under the conditions of  $[NHO1]_0/[BnOH]_0/[M]_0 = 1/2/100$ , (b) Plots of  $\ln([M]_0/[M]_t)$  versus reaction time (0.5 h - 4 h) under the conditions of  $[NHO1]_0/[TU1]_0/[BnOH]_0/[M]_0 = 1/2/2/100$ .  $M = \delta$ -VL.
